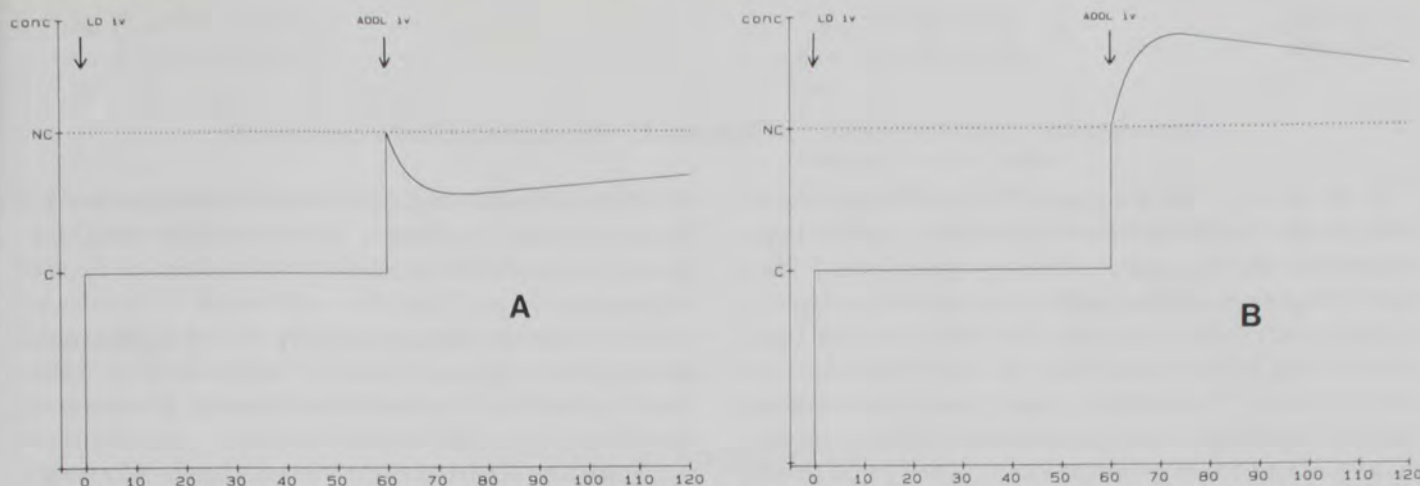

FIG. 1. A computer simulation of the predicted plasma concentration (CONC) using equation 2 of Alvis *et al.*<sup>1</sup> The proposed equations are adequate for the first desired concentration (C), but when a higher predicted concentration is desired (NC), an under prediction (A) or over prediction (B) from the desired level occurs, depending on the definition of "t" in equation 2.

$$u_1(t) = V_c \cdot C \cdot M_p \cdot (k_{10} + k_{12} \cdot e^{-k_{21} \cdot t} + k_{13} \cdot e^{-k_{31} \cdot t}) \\ + V_c \cdot (NC - C) \cdot M_p \times \\ (k_{10} + k_{12} \cdot e^{-k_{21} \cdot (t-t_1)} + k_{13} \cdot e^{-k_{31} \cdot (t-t_1)}) \quad (3)$$

where the origin of  $t$  is the time at which the initial loading dose was administered, and  $t_1$  is the time at which the first additional loading dose is given. Similarly, although somewhat more complex, the solution can be derived for the infusion rate after the  $n$ th additional bolus, using again the superposition principle.

PIERRE MAITRE, M.D.  
SAM VOZEH, M.D.  
*Department of Anesthesia and  
Division of Clinical Pharmacology*

Anesthesiology  
65:345, 1986

*In Reply:*—We appreciate the insightful and thorough analysis offered by Drs. Maitre, Vozeh, and Stanski; we are continually modifying and upgrading our CACI software, and we will actively consider the relevance to our current system design of the suggestions provided. We find CACI to be a useful tool for both clinical research and patient management, and we are pleased to hear of others who share our interest in pharmacokinetically driven drug infusion.

*Department of Internal Medicine  
University of Basel / Kantonsspital  
CH-4031 Basel, Switzerland*

DONALD STANSKI, M.D.  
*Associate Professor of Anesthesia  
Stanford University School of Medicine  
Veterans Administration Medical Center  
Palo Alto, California 94305*

#### REFERENCES

1. Alvis JM, Reves JG, Govier AV, Menkhaus PG, Henling CE, Spain JA, Bradley E: Computer-assisted continuous infusion of fentanyl during cardiac anesthesia: Comparison with a manual method. *ANESTHESIOLOGY* 63:41-49, 1985

(Accepted for publication May 29, 1986.)

J. MICHAEL ALVIS, M.S.  
JAMES R. JACOBS, B.E.S.  
J. G. REVES, M.D.  
*Department of Anesthesiology  
Duke University Medical Center  
Durham, North Carolina 27710*

(Accepted for publication May 29, 1986.)
